# Supplementary material for: Rapid, instrument-free colorimetric quantification of DNA using Nile Blue
Source: Royal Society of Chemistry journal article supplement (doi:10.1039/d1ay01598b), 2022-01-01

1  
2  
3  
4  
5  
6  
7  
8  
9  
10  
11  
12  
13  
14  
15  
16  
17  
18  
19  
20  
21  
22  
23  
24

## Supporting Information

### **Rapid, instrument-free colorimetric quantification of DNA using Nile Blue**

Heather D. Whitehead and Marya Lieberman\*

§ Department of Chemistry and Biochemistry, University of Notre Dame, Notre Dame, IN 46556, USA

\*Corresponding author

Content of Supporting Information:

17 pages (including cover sheet)

3 Tables

10 Figures

25 **Determination of a final [DNA] based on each concentration range determined through k-**  
26 **means cluster analysis of 5 NB concentrations.** In Table S3 the column “Final determined  
27 [DNA] ( $\mu\text{g/mL}$ )” represents using the cluster identification/concentration ranges determined for  
28 all 5 concentrations of NB to narrow the likely concentration or concentration range of DNA  
29 present. For example, Blinded Solution 4 had determined concentration ranges of 15-45,15-45,  
30 0-20, 0-40, and 0-60  $\mu\text{g/mL}$ . The concentration range of 0-60  $\mu\text{g/mL}$  becomes narrowed by 0-40  
31  $\mu\text{g/mL}$ , and 0-40  $\mu\text{g/mL}$  becomes narrowed by 0-20  $\mu\text{g/mL}$ . From there the remaining  
32 concentration ranges were 15-45  $\mu\text{g/mL}$  but would be expected to have an upper-bound of 20  
33  $\mu\text{g/mL}$  based on the 0-20  $\mu\text{g/mL}$  range determined. Therefore, the final likely [DNA] would be  
34 15-20  $\mu\text{g/mL}$  using this approach.

35 Another example from Table S3 includes Blinded Solution 11 which had determined  
36 concentration ranges of 15-45, 55-100,25-30, 70-100, 45-100, and 65-100  $\mu\text{g/mL}$ . The  
37 concentration range of 45-100  $\mu\text{g/mL}$  becomes narrowed by 55-100  $\mu\text{g/mL}$  which becomes  
38 narrowed by 65-100  $\mu\text{g/mL}$  and by 70-100  $\mu\text{g/mL}$ . The concentration range of 15-45 that was  
39 determined does not overlap with any of these narrowed concentration ranges, demonstrating a  
40 likely misidentification for that sample. Using the high level of redundancy given by 4/5 of the  
41 concentration ranges, this final concentration range can be considered an outlier due to a  
42 misidentification, giving a final concentration range of 70-100  $\mu\text{g/mL}$ .

43 Occasionally, multiple misidentifications will affect the final determined concentration,  
44 as is the case for Blinded Solutions 1 and 3 in Table S3. Though, for these samples the difference  
45 between the true and determined [DNA] was within 5  $\mu\text{g/mL}$ .

46  
47

48 **Results of the response of NB to various reagents used in NA preparations.** As shown in  
49 Figure S8 all 5 reagents tested (Triton X-100, SDS, ethanol, sodium chloride, and a 1:1  
50 phenol:chloroform solution) produced a shift in their mean inverted red colorimetric intensities  
51 from that of the true negative (10 mM Tris pH 8.0). Only SDS led to a decrease in the mean  
52 inverted red colorimetric intensity and all other reagents led to an increase. A description of the  
53 likely interactions causing these shifts for each reagent is given here.

54

55 *SDS:* SDS is an anionic surfactant that has a critical micelle concentration of 0.25%  
56 (w/v). The concentrations measured here include 0.25, 0.125, 0.06, 0.03, and 0.015%  
57 (w/v). At 0.25% SDS the colorimetric response in the red channel is slightly shifted  
58 downwards, though a visual colorimetric response from blue to purple is not observed. At  
59 all concentrations below 0.25% a significant decrease in the mean inverted colorimetric  
60 intensity as well as a visual purple colorimetric response can be seen. Previous work  
61 (Mitra, R. K.; Sinha, S. S.; Pal, S. K., Interactions of Nile Blue with Micelles, Reverse  
62 Micelles and a Genomic DNA. *Journal of Fluorescence* **2008**, *18* (2), 423-432.) on the  
63 interaction of NB and SDS demonstrated that at concentrations of SDS below its critical  
64 micelle concentration anionic SDS molecules can interact with cationic NB molecules  
65 through electrostatic and hydrophobic interactions. It was also demonstrated that at  
66 concentrations at and above the critical micelle concentration NB preferentially resides in  
67 the hydrophobic core of the micelle rather than interacting with the anionic, hydrophilic  
68 heads of the micelle. When SDS was spiked into a solution of dsDNA a decrease in the  
69 inverted red colorimetric is observed, but the decrease is not as significant as the decrease  
70 of the true positive (40  $\mu\text{g/mL}$  dsDNA). This illustrates that when SDS (at a

71 concentration below the critical micelle concentration) and DNA are both present in a  
72 sample, NB preferentially interacts with SDS instead of DNA and generates a  
73 colorimetric response closer to that of SDS than of just DNA. It is likely that other  
74 anionic surfactants would produce similar results as those of SDS, highlighting that care  
75 should be taken to minimize the presence of such reagents in DNA samples undergoing  
76 analysis with NB.  
77

78 *Triton X-100:* Triton X-100 is a nonionic surfactant that has a critical micelle  
79 concentration of 0.02% (w/v). The concentrations measured here include 1, 0.1, 0.01,  
80 0.001, and 0.0001% (w/v). At 1% Triton X-100 the colorimetric response in the red  
81 channel is unaffected. Though, at concentrations below 1% a significant increase in the  
82 inverted red colorimetric is observed with the visual colorimetric response remaining  
83 blue. When Triton X-100 was spiked into a solution of dsDNA a slight increase (~10  
84 units) in the inverted red colorimetric intensity as compared to the true positive (40  
85  $\mu\text{g/mL}$  dsDNA) was observed. These results indicate that unlike anionic SDS, nonionic  
86 Triton X-100 has significantly less competitive interactions with DNA for NB. It is likely  
87 that the increases in the inverted red colorimetric intensity are due to hydrophobic, rather  
88 than electrostatic, interactions between Triton X-100 and NB.  
89

90 *Ethanol:* Ethanol is a reagent commonly used in the purification of isolated NA. The  
91 concentrations measured here include 1, 0.1, 0.01, 0.001, and 0.0001% (w/v). At 1%  
92 ethanol the colorimetric response in the red channel is unaffected. Though, at  
93 concentrations below 1% a significant increase in the inverted red colorimetric is  
94 observed with the visual colorimetric response remaining blue. When ethanol was spiked  
95 into a solution of dsDNA no effect on the inverted red colorimetric intensity as compared  
96 to the true positive (40  $\mu\text{g/mL}$  dsDNA) was observed. The differences in the inverted red  
97 colorimetric intensity observed for NB spiked with ethanol highlight solvation effects on  
98 the visual color of NB. Importantly, these effects are not seen when DNA is present  
99 demonstrating the interactions between NB and DNA are stronger than those between NB  
100 and ethanol.  
101

102 *Sodium chloride:* Sodium chloride is a reagent commonly used in the isolation and  
103 purification of NA. The concentrations measured here include 0.06, 0.03, 0.015, 0.0075,  
104 and 0.004% (w/v). At all concentrations the colorimetric response in the red channel is  
105 moderately increased. When sodium chloride was spiked into a solution of dsDNA no  
106 effect on the inverted red colorimetric intensity as compared to the true positive (40  
107  $\mu\text{g/mL}$  dsDNA) was observed. It is unclear what causes the differences in the inverted  
108 red colorimetric intensity observed for NB spiked with sodium chloride, though  
109 importantly, these effects are not seen when DNA is present.  
110

111 *Phenol:Chloroform solution:* Phenol:chloroform solutions are commonly used in the  
112 isolation of NA. The concentrations measured here include 1, 0.5, 0.25, 0.125, and 0.06%  
113 (w/v). At 1% the colorimetric response in the red channel is unaffected. Though, at  
114 concentrations below 1% a significant increase in the inverted red colorimetric is  
115 observed with the visual colorimetric response remaining blue. When the  
116 phenol:chloroform solution was spiked into a solution of dsDNA no effect on the

117 inverted red colorimetric intensity as compared to the true positive (40 µg/mL dsDNA)  
118 was observed. It is likely that the hydrophobic nature of these organic solvents creates  
119 interactions with NB to cause the differences in the inverted red colorimetric intensity.  
120 Importantly, these effects are not seen when DNA is present demonstrating the  
121 interactions between NB and DNA are stronger than those between NB and the  
122 phenol:chloroform solution.  
123  
124  
125  
126  
127

128 **Figure S1.** Plot that visualizes a well plate with the mean inverted red and green colorimetric  
129 intensity of the incident light from the art tracing pad (Amazon Product No. B07H7FLJX1)  
130 present in each of the wells. Interaction of the well plate and the art tracing pad causes the wells  
131 across a row to have variable incident mean inverted colorimetric intensities. The effect can be  
132 seen in both the red and green colorimetric channels. To account for this effect, mean inverted  
133 red and green colorimetric data from solutions of NB with DNA are subtracted by the mean  
134 inverted red and green colorimetric channel from an empty well in the same column as that  
135 solution. This normalization process is analogous to a background subtraction performed on  
136 spectrometers and is performed for each captured image, making the normalization specific to  
137 the image to account for variability between images.

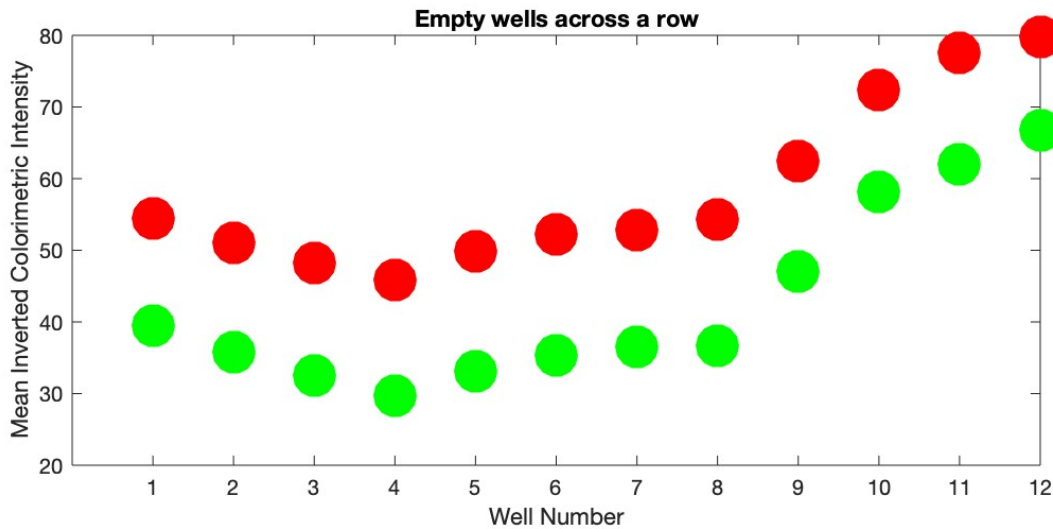

138 **Figure S2.** Results of image analysis in the mean inverted red colorimetric intensity for each  
139 concentration of NB with concentrations of DNA from 0-100  $\mu\text{g}/\text{mL}$ . The data shown are the  
140 average of five replicates for each sample and error bars are the standard deviation of those  
141 replicates.  
142

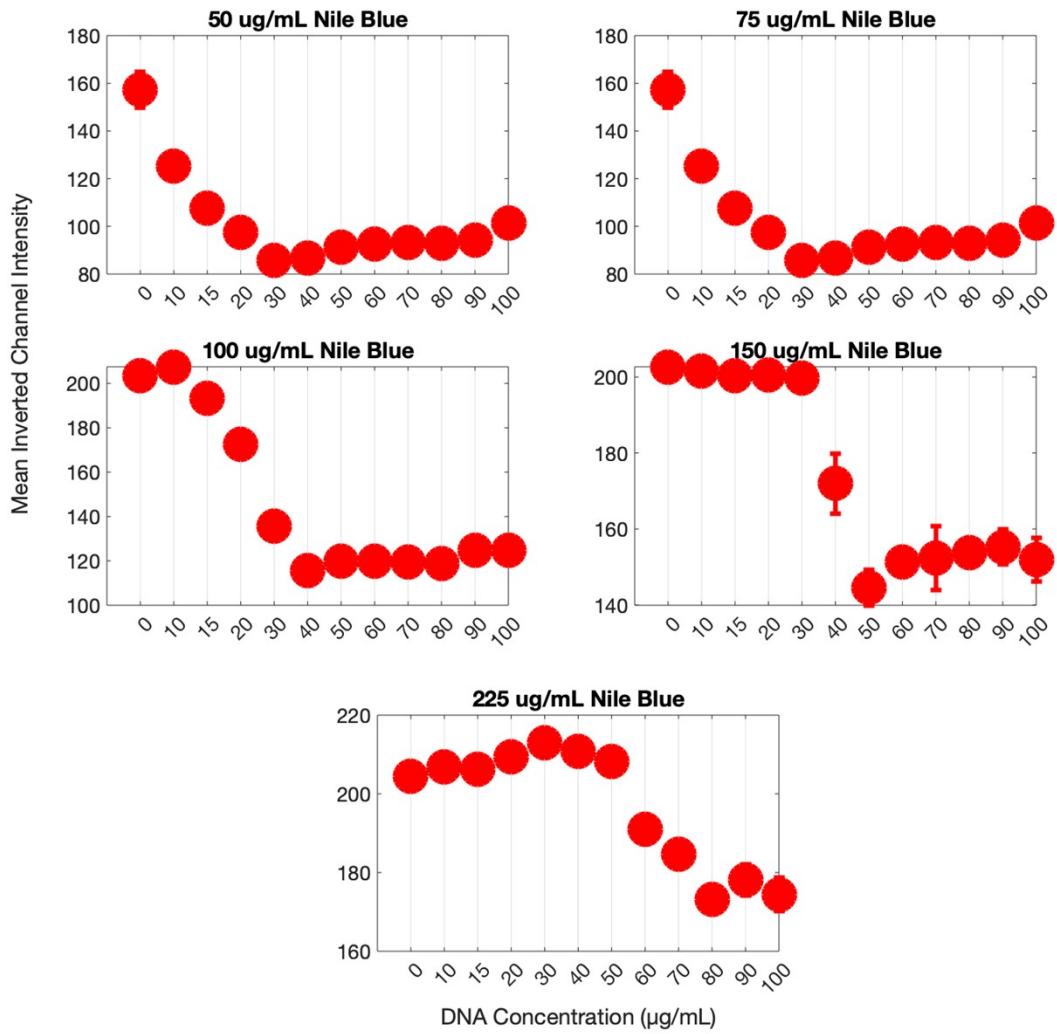

143 **Table S1.** Ratio-dependent response of NB to DNA illustrated by the DNA concentrations, both  
144 the minimal (low) and maximal (high), that produce a visual purple color when combined with  
145 each concentration of NB. The low concentration given is the first concentration of DNA where  
146 a visual purple response with NB can be seen. The high concentration is the last concentration  
147 where a visual purple response with NB can be seen. Both these high and low concentrations  
148 increase as the concentration of NB increases, indicating a positive relationship between NB an  
149 DNA. This data was used to determine the range of ratios where the concentration of NB:DNA  
150 produces a visual purple response, which is linked to changes in colorimetric intensities via  
151 image analysis. The range of ratios was determined to be approximately 1.5-4.0.

| NB<br>Concentration<br>( $\mu\text{g/mL}$ ) | DNA Concentration<br>( $\mu\text{g/mL}$ ) |      | Ratio of<br>NB:DNA |      |
|---------------------------------------------|-------------------------------------------|------|--------------------|------|
|                                             | Low                                       | High | Low                | High |
| 50                                          | 15                                        | 30   | 3.3                | 1.7  |
| 75                                          | 20                                        | 40   | 3.8                | 1.9  |
| 100                                         | 30                                        | 50   | 3.3                | 2    |
| 150                                         | 50                                        | 70   | 3.0                | 2.1  |
| 225                                         | 60                                        | 80   | 3.8                | 2.9  |

152  
153  
154  
155  
156  
157  
158  
159  
160  
161  
162  
163  
164  
165  
166  
167  
168  
169  
170  
171  
172  
173  
174  
175  
176  
177  
178  
179  
180  
181  
182  
183  
184  
185  
186  
187

188 **Figure S3.** Elbow plot showing the percentage of variance in the red and green colorimetric  
189 intensity data that can be explained by an increasing cluster number for each of the  
190 concentrations (50, 75, 100, 150, and 225  $\mu\text{g}/\text{mL}$ ) of NB.  
191

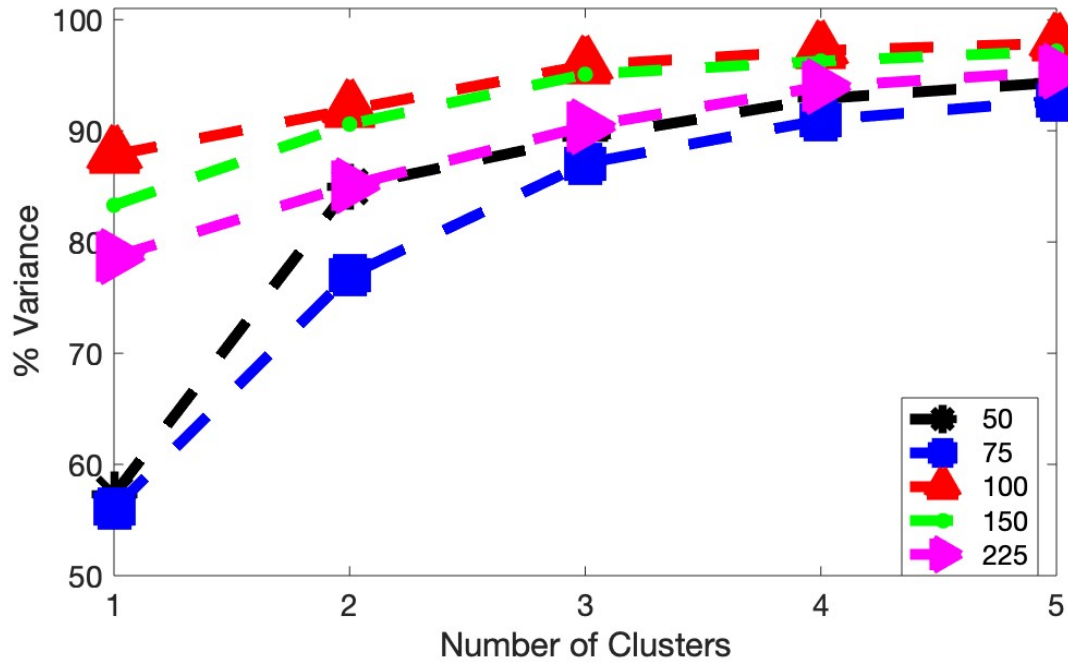

192  
193  
194



195 **Figure S4.** Cluster plots formed from k-means cluster analysis of the colorimetric response (red  
196 and green channel) for each of the remaining concentrations of NB with DNA concentrations  
197 from 0-100  $\mu\text{g/mL}$ . Each concentration had 5 replicates (data points) and the formed clusters  
198 enclosed in error ellipses representing the 95% confidence interval. The concentration range (in  
199  $\mu\text{g/mL}$ ) within each cluster is given next to the cluster.  
200

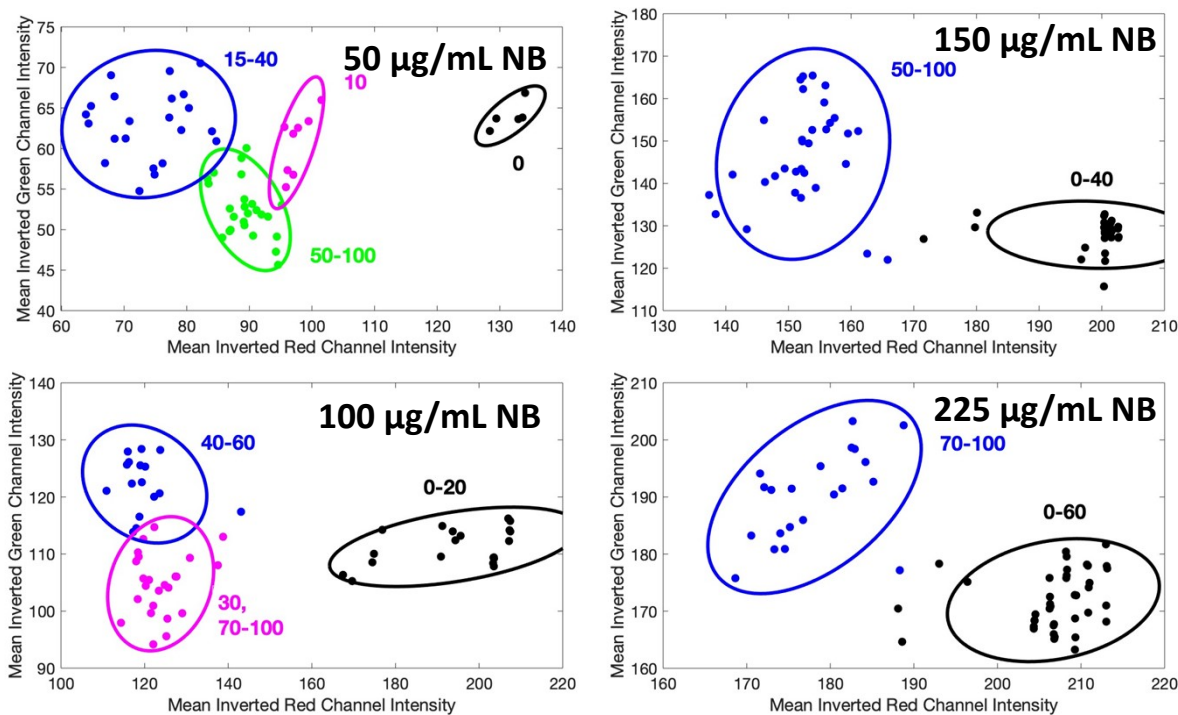

201

202 **Table S2.** Concentration ranges of DNA that can be inferred based on the k-means cluster  
 203 analysis of the colorimetric response (red and green channel) for each of the concentrations of  
 204 NB.

205

206

207

208

209

210

211

212

213

214

215

216

217

| [Nile Blue] | 50<br>μg/mL | 75<br>μg/mL | 100<br>μg/mL  | 150<br>μg/mL | 225<br>μg/mL |
|-------------|-------------|-------------|---------------|--------------|--------------|
|             | 0           | 0           | 0-20          | 0-40         | 0-60         |
| [DNA]       | 10          | 10-15       | 25-30, 70-100 | 45-100       | 65-100       |
| (μg/mL)     | 15-45       | 20-50       | 35-65         |              |              |
|             | 50-100      | 55-100      |               |              |              |

218 **Table S3.** Concentration ranges of DNA in blinded samples inferred from the k-means cluster  
 219 analysis of the colorimetric response (red and green channel) for each of the blinded samples of  
 220 DNA ran against all concentrations of NB. Cells highlighted orange are those where the  
 221 concentrations were incorrectly identified. The column “Final determined [DNA] ( $\mu\text{g}/\text{mL}$ )”  
 222 represents using the cluster identification/concentration ranges determined for all 5  
 223 concentrations of NB to narrow the likely concentration or concentration range of DNA present.  
 224 For example, Blinded Solution 4 had determined concentration ranges of 15-45, 15-45, 0-20, 0-  
 225 40, and 0-60  $\mu\text{g}/\text{mL}$ . The concentration range of 0-60  $\mu\text{g}/\text{mL}$  becomes narrowed by 0-40  $\mu\text{g}/\text{mL}$ ,  
 226 and 0-40  $\mu\text{g}/\text{mL}$  becomes narrowed by 0-20  $\mu\text{g}/\text{mL}$ . From there the remaining concentration  
 227 ranges were 15-45  $\mu\text{g}/\text{mL}$  but would be expected to have an upper-bound of 20  $\mu\text{g}/\text{mL}$  based on  
 228 the 0-20  $\mu\text{g}/\text{mL}$  range determined. Therefore, the final likely [DNA] would be 15-20  $\mu\text{g}/\text{mL}$   
 229 using this approach. A more detailed description of this process is given in the text at the start of  
 230 the SI.

| Blinded Solution Number | Cluster identifications or concentration ranges for each blinded solution ( $\mu\text{g}/\text{mL}$ ) |        |               |        |        | Final determined [DNA] ( $\mu\text{g}/\text{mL}$ ) | True [DNA] ( $\mu\text{g}/\text{mL}$ ) |
|-------------------------|-------------------------------------------------------------------------------------------------------|--------|---------------|--------|--------|----------------------------------------------------|----------------------------------------|
|                         | 50                                                                                                    | 75     | 100           | 150    | 225    |                                                    |                                        |
| 1                       | 15-45                                                                                                 | 15-45  | 35-65         | 45-100 | 0-60   | 45                                                 | 50                                     |
| 2                       | 10                                                                                                    | 10-15  | 0-20          | 0-40   | 0-60   | 10                                                 | 10                                     |
| 3                       | 15-45                                                                                                 | 15-45  | 25-30, 70-100 | 0-40   | 0-60   | 25-30                                              | 35                                     |
| 4                       | 15-45                                                                                                 | 15-45  | 0-20          | 0-40   | 0-60   | 15-20                                              | 20                                     |
| 5                       | 15-45                                                                                                 | 15-45  | 35-65         | 45-100 | 0-60   | 45                                                 | 45                                     |
| 6                       | 50-100                                                                                                | 55-100 | 25-30, 70-100 | 45-100 | 65-100 | 70-100                                             | 85                                     |
| 7                       | 50-100                                                                                                | 55-100 | 35-65         | 45-100 | 65-100 | 65                                                 | 65                                     |
| 8                       | 50-100                                                                                                | 55-100 | 25-30, 70-100 | 45-100 | 65-100 | 70-100                                             | 100                                    |
| 9                       | 15-45                                                                                                 | 10-15  | 0-20          | 0-40   | 0-60   | 15                                                 | 15                                     |
| 10                      | 50-100                                                                                                | 55-100 | 25-30, 70-100 | 45-100 | 65-100 | 70-100                                             | 90                                     |
| 11                      | 15-45                                                                                                 | 55-100 | 25-30, 70-100 | 45-100 | 65-100 | 70-100                                             | 75                                     |
| 12                      | 15-45                                                                                                 | 15-45  | 25-30, 70-100 | 0-40   | 0-60   | 25-30                                              | 25                                     |
| 13                      | 0                                                                                                     | 0      | 0-20          | 0-40   | 0-60   | 0                                                  | 0                                      |
| 14                      | 50-100                                                                                                | 15-45  | 35-65         | 45-100 | 0-60   | 50-60                                              | 60                                     |
| 15                      | 50-100                                                                                                | 15-45  | 35-65         | 45-100 | 0-60   | 50-60                                              | 55                                     |
| 16                      | 15-45                                                                                                 | 15-45  | 25-30, 70-100 | 0-40   | 0-60   | 25-30                                              | 30                                     |
| 17                      | 0                                                                                                     | 10-15  | 0-20          | 0-40   | 0-60   | 0-10                                               | 5                                      |
| 18                      | 50-100                                                                                                | 55-100 | 25-30, 70-100 | 45-100 | 65-100 | 70-100                                             | 80                                     |
| 19                      | 15-45                                                                                                 | 15-45  | 35-65         | 0-40   | 0-60   | 35-40                                              | 40                                     |
| 20                      | 15-45                                                                                                 | 10-15  | 25-30, 70-100 | 45-100 | 65-100 | 70-100                                             | 95                                     |
| 21                      | 10                                                                                                    | 15-45  | 25-30, 70-100 | 45-100 | 65-100 | 70-100                                             | 70                                     |

231  
 232  
 233  
 234

235 **Figure S5.** Changes in the mean inverted red colorimetric intensity of the response of NB with  
236 DNA solutions ranging from 0-100  $\mu\text{g/mL}$  at various starting pH values (2-12) of NB. The  
237 maximal difference in the colorimetric response from that of the normal pH of NB (pH=4) was  
238 12%, demonstrating that the effect of the starting pH of NB on the colorimetric response is  
239 relatively low. Importantly, the differences in the measured colorimetric intensity do not affect  
240 the observed trend (i.e. a decrease in the mean inverted red colorimetric intensity). This effect  
241 was observed when combining the solutions of NB in equal volumes with the solutions of DNA  
242 which are prepared in 10 mM Tris at pH 8.0. It is likely that upon addition of the DNA solution  
243 to NB, the pH of the entire solution (NB + DNA) is closer to that of the DNA solution (pH=8.0)  
244 than of the initial NB solution (pH=2-12)

245  
246  
247

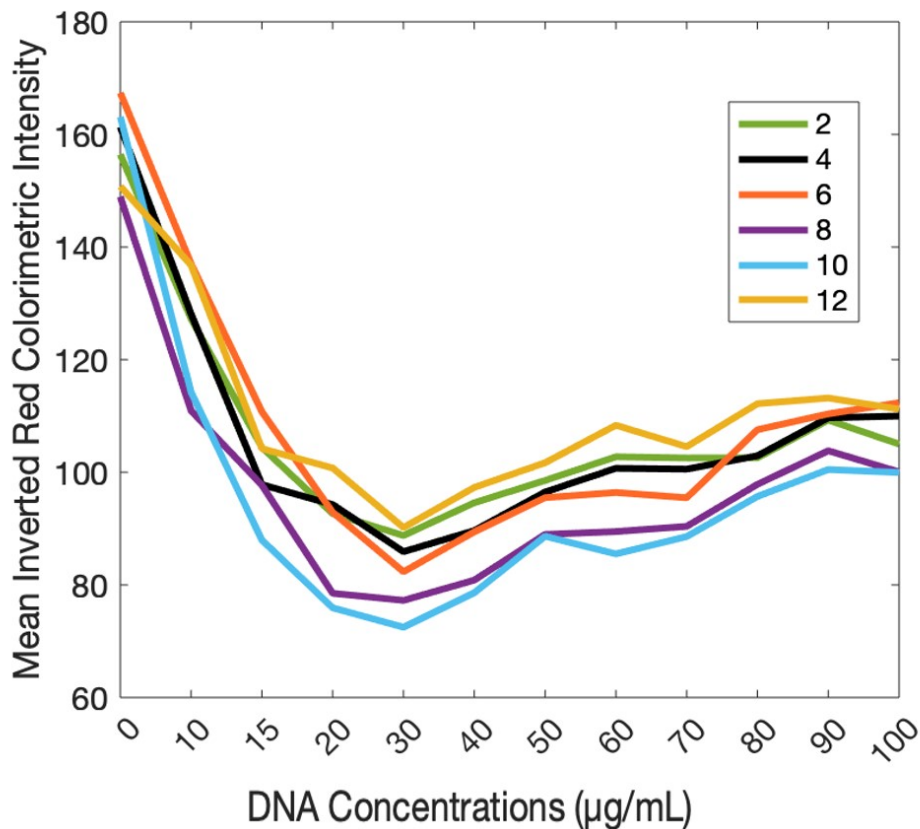

248 **Figure S6.** Changes in the mean inverted red colorimetric intensity of the response of NB with  
249 DNA solutions ranging from 0-100  $\mu\text{g/mL}$  at incubation temperatures of 5  $^{\circ}\text{C}$  (fridge), 20  $^{\circ}\text{C}$   
250 (room temperature), and 35  $^{\circ}\text{C}$  (oven). At 5  $^{\circ}\text{C}$  and 35  $^{\circ}\text{C}$  the measured colorimetric intensities  
251 of the concentrations of DNA tested were on average 8.5% and 4.5% less than the response at 20  
252  $^{\circ}\text{C}$ . This demonstrates that when this method using NB is performed at temperatures within the  
253 range of 5-35  $^{\circ}\text{C}$  the effect of varying temperatures is negligible and observed trend in the  
254 response of NB to DNA is preserved.

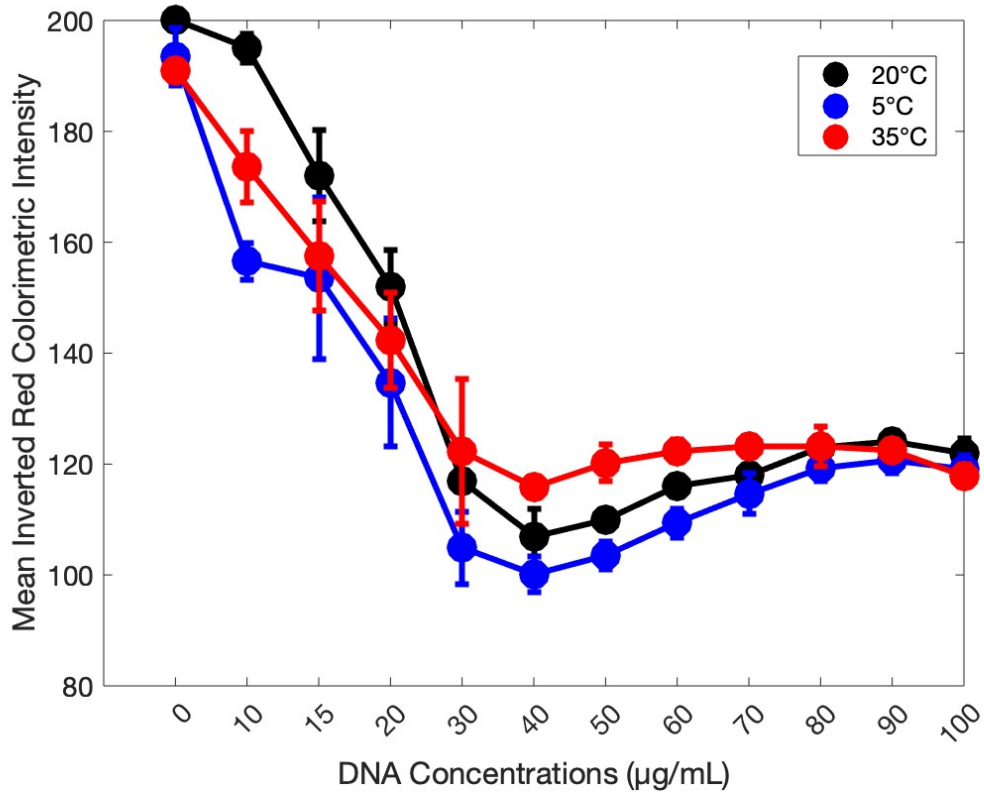

255  
256  
257  
258  
259

260 **Figure S7.** Changes in the mean inverted red colorimetric intensity of the response of NB with  
261 DNA solutions ranging from 0-100  $\mu\text{g/mL}$  when imaged under different incident lighting  
262 conditions. These conditions were measured using the art tracing pad previously described, using  
263 an iPad with a white background produced by the free app “ColorLumina”, using ambient light  
264 against a white background, and on the art tracing pad using a clear-sided well plate in place of  
265 the black-sided well plate. Compared to the art tracing pad, the measured colorimetric intensities  
266 for all three alternatives were significantly lower, demonstrating the decrease in the amount of  
267 incident light from all three alternatives. However, the observed NB response to DNA is  
268 relatively preserved in each system and only the absolute colorimetric intensity values are  
269 affected.

270  
271  
272  
273  
274  
275

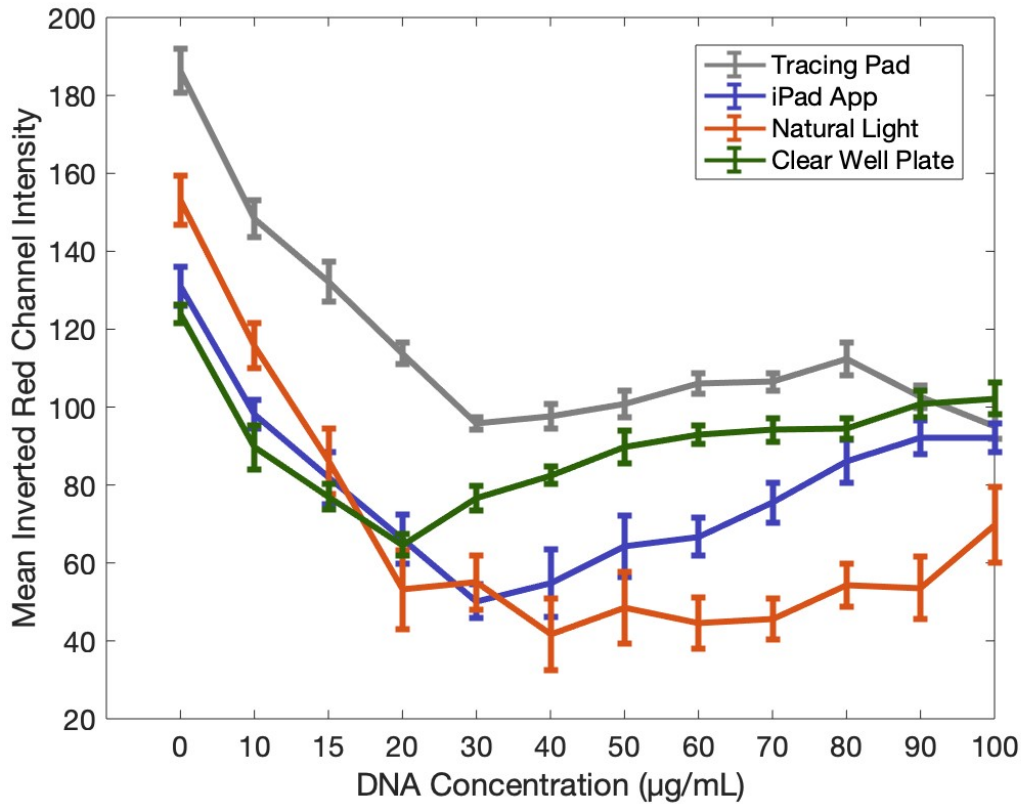

276 **Figure S8.** Colorimetric response of NB with various reagents to determine the specificity of NB  
 277 towards DNA. **A)** All reagents were prepared as solutions at the 5 concentrations shown in the  
 278 figure (w/v %) and combined with a 75  $\mu\text{g}/\text{mL}$  solution of NB. The response given across each  
 279 reagent and concentration range was compared to that of the response of the true negative (10  
 280 mM Tris pH 8.0). See the text above for a description of each reagent's response. **B)** For each  
 281 reagent the concentration that produced the greatest change in the mean inverted red colorimetric  
 282 intensity was spiked into solutions of 40  $\mu\text{g}/\text{mL}$  dsDNA and combined with a 75  $\mu\text{g}/\text{mL}$  solution  
 283 of NB. The response given across each reagent was compared to that of the response of the true  
 284 positive (40  $\mu\text{g}/\text{mL}$  dsDNA). See the text above for a description of each reagent's response.  
 285  
 286

**A**

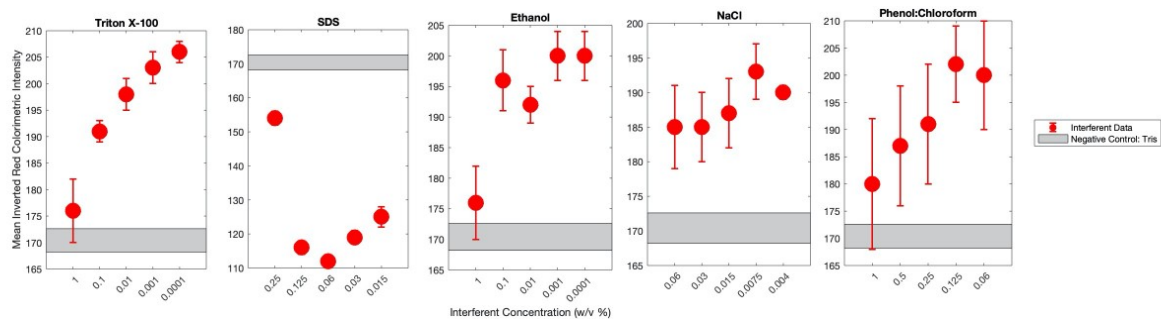

**B**

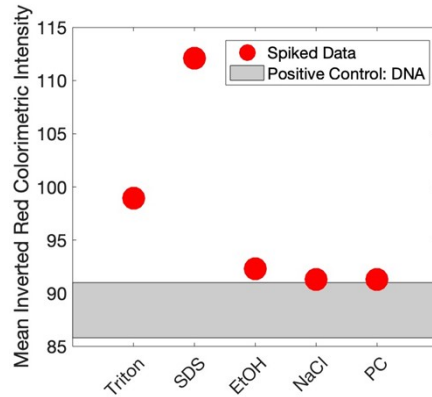

287  
 288

290 **Figure S9.** Colorimetric response of a 75  $\mu\text{g}/\text{mL}$  solution of NB titration against various  
291 concentrations of dsDNA of either 159 base pairs (IDT) or 2,000 base pairs (salmon sperm, SS)  
292 in length.

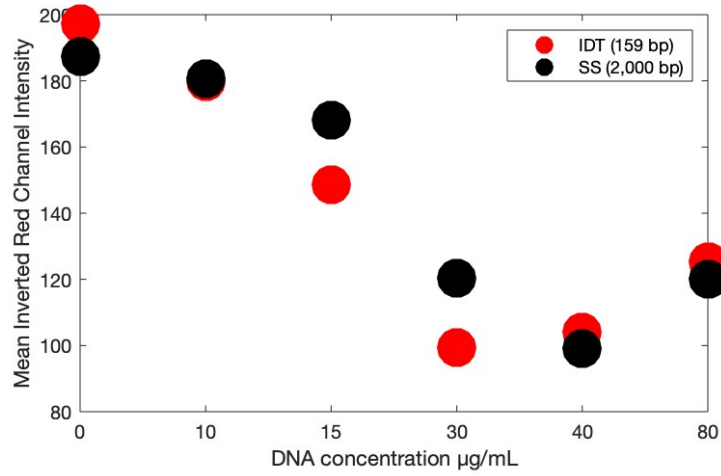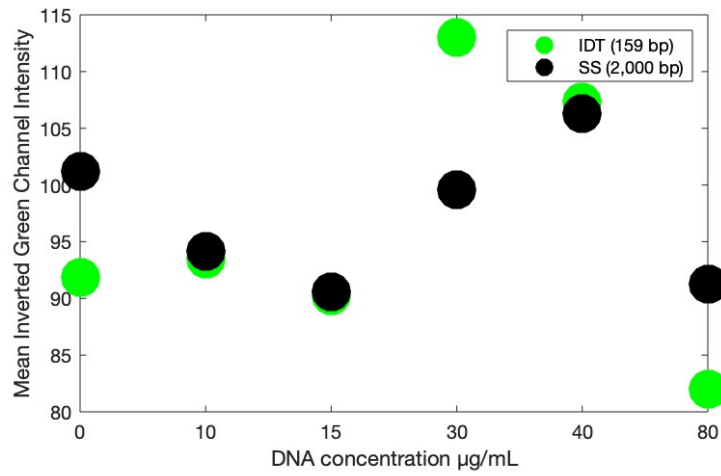



293 **Figure S10.** Migration distance of NB spots on paper strips when exposed to concentrations of  
 294 DNA at 0, 50, and 100  $\mu\text{g/mL}$ . Solutions of NB were added to Ahlstrom 319 filter paper strips  
 295 prepared at a width of 3 mm and a length of 60 mm using wax to create hydrophobic barriers. 4  
 296  $\mu\text{L}$  spots of 225  $\mu\text{g/mL}$  NB were added to the start of the strip and allowed to dry. The strips  
 297 were placed in solutions of 0, 50, and 100  $\mu\text{g/mL}$  of DNA (see inset image). Through capillary  
 298 action the DNA solutions move up the paper strip, coming into contact with the NB spot. Once  
 299 the solutions had moved up  $\frac{3}{4}$  the length of the paper strip they were removed from solution and  
 300 placed on a paper towel for three minutes before imaging in natural light. These results  
 301 demonstrate that as the concentration of DNA increases, the distance NB migrates down the  
 302 paper strip increases. At 0  $\mu\text{g/mL}$  the NB spot does not migrate beyond the initial spotted  
 303 location. At 50 and 100  $\mu\text{g/mL}$  of DNA the spot of NB appears to migrate down the paper lane,  
 304 visualized by the blue color of NB. Additionally, the distance traveled by the 100  $\mu\text{g/mL}$  sample  
 305 is greater than that of the 50  $\mu\text{g/mL}$  sample.

306  
 307  
 308

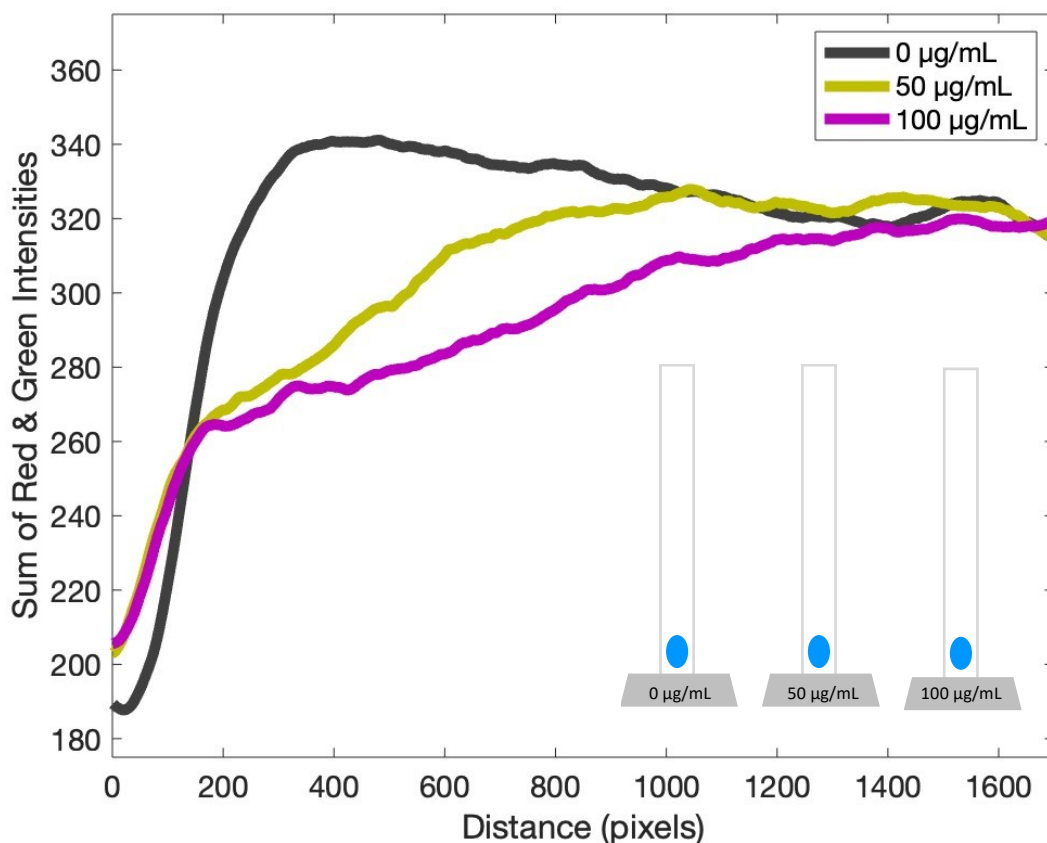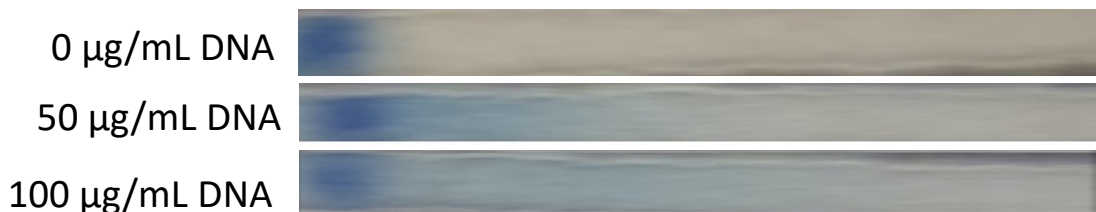

Supplement: d1ay01598b1.pdf [file d1ay01598b1.pdf]
